# Supplementary material for: Phenylmaleimide-containing PET-based copolyester: cross-linking from 2π + π cycloaddition toward flame retardance and anti-dripping
Source: Royal Society of Chemistry journal article supplement (doi:10.1039/c6py00183a), 2016-01-01
Supplement: c6py00183a1.pdf [file c6py00183a1.pdf]

## **ELECTRONIC SUPPLEMENTARY INFORMATION**

for

# **Phenylmaleimide-Containing PET-Based Copolyester: Cross-Linking from $2\pi+\pi$ Cycloaddition toward Flame Retardance and Anti-Dripping**

Xue Dong, Li Chen\*, Rong-Tao Duan, and Yu-Zhong Wang\*

*Center for Degradable and Flame-Retardant Polymeric Materials, College of Chemistry, State Key Laboratory of Polymer Materials Engineering, National Engineering Laboratory of Eco-Friendly Polymeric Materials (Sichuan), Sichuan University, Chengdu 610064, China.*

- (1) NMR spectra and the corresponding integral peak areas of the copolyester.
- (2) Two videos of a small-scale flammability test for PET and PET-co-DPDI10 ignited by Bunsen Burner. Anti-dripping and self-extinguishing performance could be observed for the copolyester.

The NMR spectra of PET-co-DPDPI2, PET-co-DPDPI5, PET-co-DPDPI10, and all relative integral data were showed as follows:

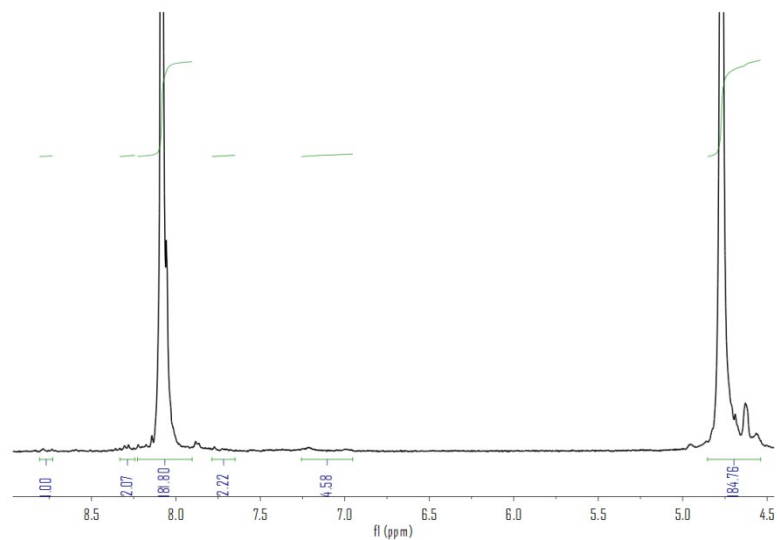

Fig.S1. <sup>1</sup>H NMR of PET-co-DPDPI2

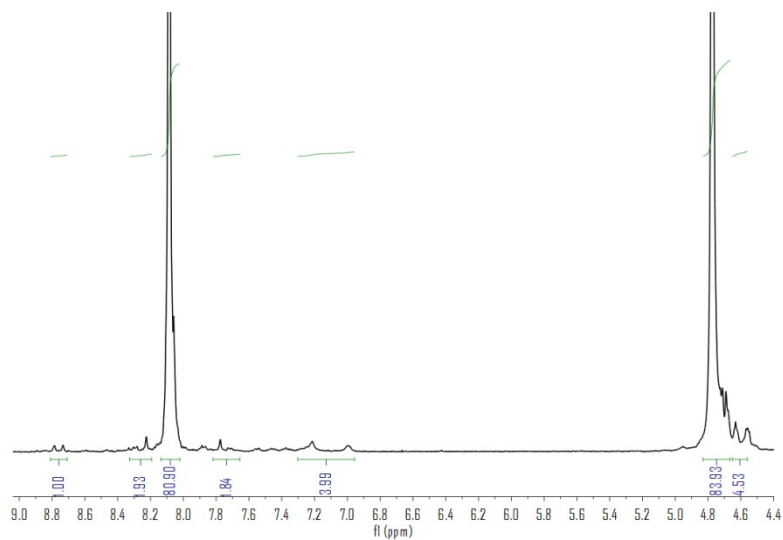

Fig.S2. <sup>1</sup>H NMR of PET-co-DPDPI5

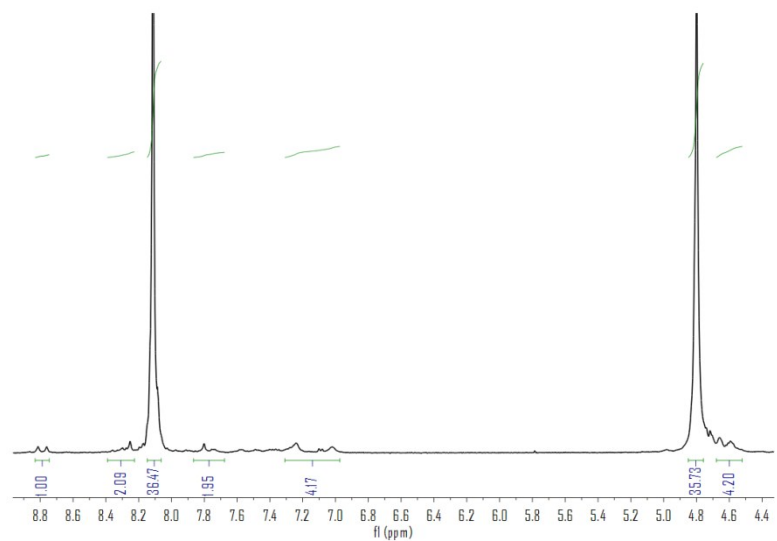

Fig.S3. <sup>1</sup>H NMR of PET-co-DPDPI10
